# Supplementary material
Source: PubMed Central journal article supplement (PMC11028424)
Supplement: 262_2017_1984_MOESM1_ESM.pdf [file 262_2017_1984_MOESM1_ESM.pdf]

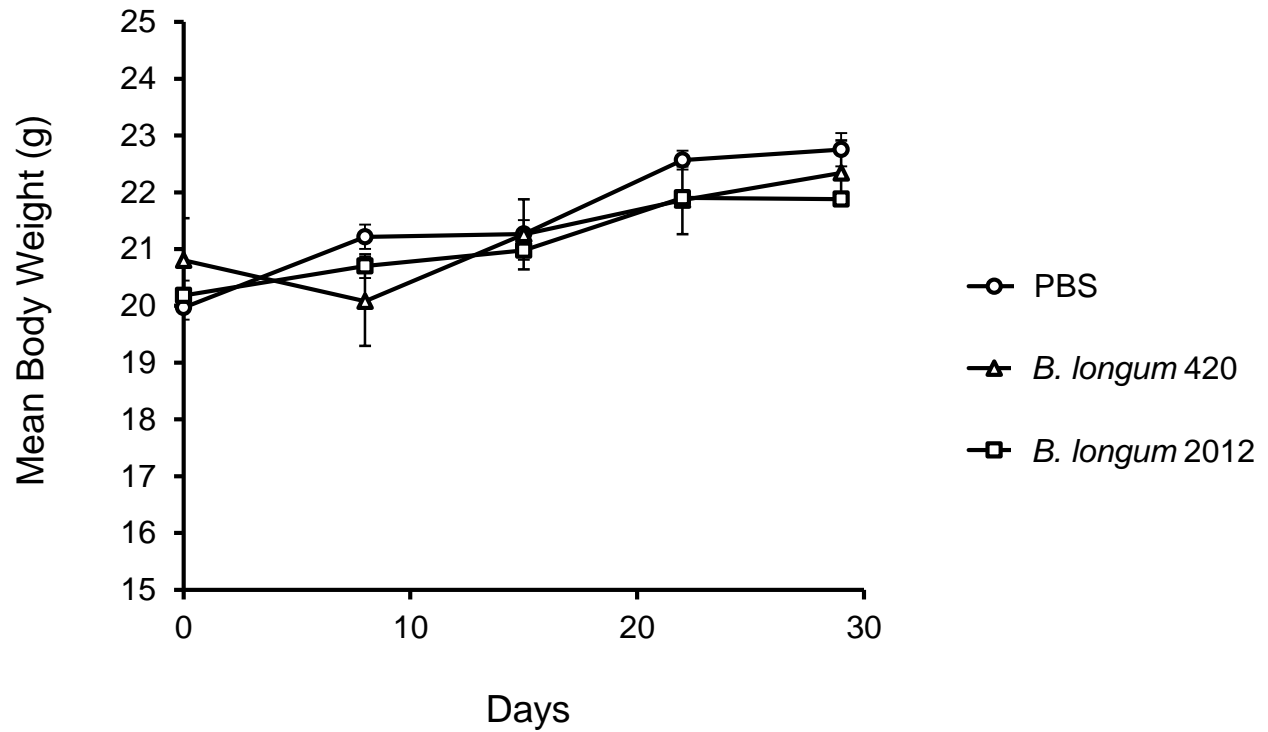

**Supplemental figure 1** Body weight changes following the oral vaccinations. The body weights of the mice (n=5 per group) were measured weekly. The mice were treated with *B. longum* 420, *B. longum* 2012, or PBS. Each data point represents the average of each group (bars,  $\pm$ SE). The mean body weight of each treatment group showed normal growth and there were no significant differences among the groups.
